# Supplementary material for: New Wild-Type Lacticaseibacillus rhamnosus Strains as Candidates to Manage Type 1 Diabetes
Source: MDPI journal article supplement (doi:10.3390/microorganisms10020272), 2022-01-25
Supplement: s1 [file s1]

## Supplementary figures: Figure S1 and Figure S2

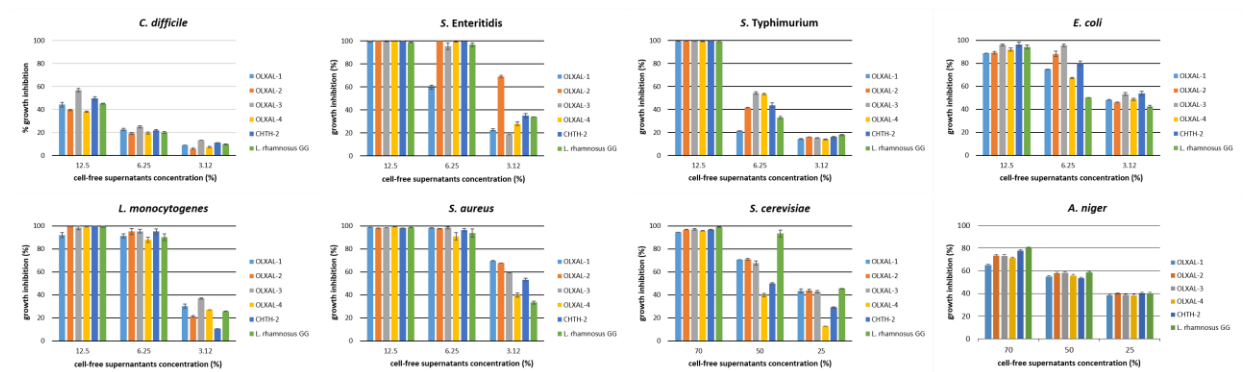

**Figure S1.** Growth inhibition activity of cell-free supernatants (CFSs) of *L. rhamnosus* strains against food spoilage and pathogenic microorganisms.

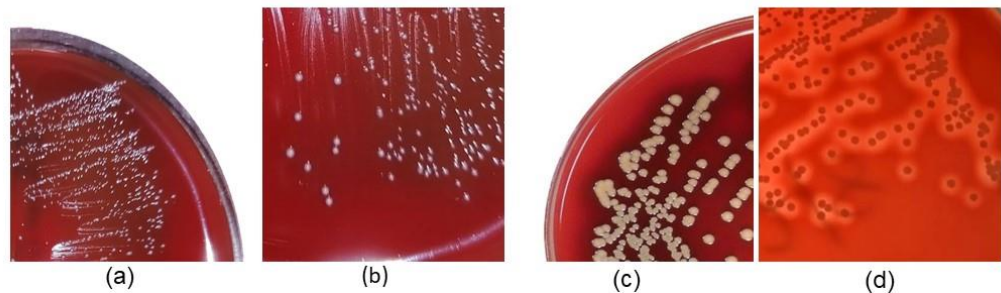

**Figure S2.** Hemolytic activity of (a) *L. rhamnosus* OLXAL-1, (b) *L. rhamnosus* GG, and (c), (d) *S. aureus* MRSA.
